# Supplementary material
Source: Springer Nature journal article supplement (https://www.springermedizin.de/resource/supplementary/13099_2010_41_MOESM4_ESM.pdf/9665386)
Supplement: MOESM4 [file 9665386]

# Dendrogram C

Similarity

*Sma*I

*Kpn*I

Serotype

ERY

NAL

CIP

AZM

AMP

CL

CM

NM

KM

GM

SM

CF

TE

SXT

SU

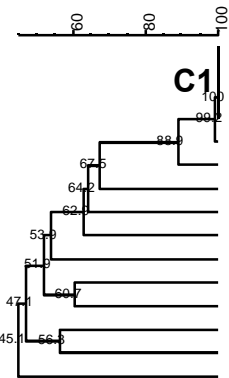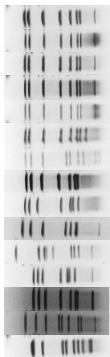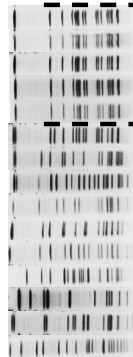

| Sample    | ERY | NAL | CIP | AZM | AMP | CL | CM | NM | KM | GM | SM | CF | TE | SXT | SU |
|-----------|-----|-----|-----|-----|-----|----|----|----|----|----|----|----|----|-----|----|
| HL:36     | S   | R   | R   | S   | R   | S  | S  | S  | S  | S  | S  | S  | R  | R   | S  |
| HL:36     | S   | R   | R   | S   | R   | S  | S  | S  | S  | S  | S  | S  | R  | R   | S  |
| HL:36     | S   | R   | R   | S   | R   | S  | S  | S  | S  | S  | S  | S  | R  | R   | S  |
| HL:36     | S   | R   | R   | S   | R   | S  | S  | S  | S  | S  | S  | S  | R  | R   | S  |
| HL:36     | S   | R   | R   | S   | R   | S  | S  | S  | S  | S  | S  | S  | R  | R   | S  |
| HL:36     | S   | R   | R   | S   | S   | S  | S  | R  | R  | S  | S  | S  | R  | R   | S  |
| Untypable | S   | R   | R   | S   | S   | S  | S  | S  | S  | S  | S  | S  | R  | R   | S  |
| HL:11     | S   | R   | R   | S   | R   | S  | S  | S  | S  | S  | S  | S  | R  | R   | S  |
| HL:36     | S   | R   | R   | S   | S   | S  | S  | S  | S  | S  | S  | S  | R  | R   | S  |
| HL:2      | S   | S   | S   | S   | S   | S  | S  | R  | S  | S  | S  | S  | R  | R   | S  |
| Untypable | S   | R   | R   | S   | S   | S  | S  | S  | S  | S  | S  | S  | R  | R   | S  |
| HL:2      | S   | R   | R   | S   | R   | S  | S  | S  | S  | S  | S  | S  | R  | R   | S  |
| HL:114    | S   | R   | R   | S   | R   | S  | S  | R  | S  | S  | R  | R  | R  | S   | S  |
| Untypable | S   | R   | R   | S   | S   | S  | S  | S  | S  | S  | S  | S  | R  | S   | S  |
| Untypable | S   | S   | S   | S   | R   | S  | S  | S  | S  | S  | S  | S  | R  | S   | S  |
